# Supplementary material for: Fish habitat restoration on the basis of water morphology simulation
Source: PeerJ. 2022 Aug 23;10:e13943. doi: 10.7717/peerj.13943 (PMC9415368; doi:10.7717/peerj.13943)
Supplement: Supplemental Information 1 — Fish resources survey before and after the project [file peerj-10-13943-s001.xlsx]

## Sheet: Sheet1
Type	Before and after	Protect the fish	endemic fish	Type of migration	Spawning type	mantissa	quality（g）	feeding habits	Habitat characteristics	Perched water	month	area	site	count
Liobagrus marginatus (Günther)	Before			Freshwater settlement	Viscous eggs	5	39.6	predacity	The current type	ground floor	6	Ⅱ	2	1
Liobagrus marginatus (Günther)	Before			Freshwater settlement	Viscous eggs	3	20.8	predacity	The current type	ground floor	6	Ⅱ	1	1
Liobagrus marginatus (Günther)	Before			Freshwater settlement	Viscous eggs	3	14.7	predacity	The current type	ground floor	4	Ⅱ	1	1
Ictalurus Punctatus (Rafinesque)	Before			Freshwater settlement	Viscous eggs	2	122.7	predacity	static type slow	ground floor	6	Ⅰ	3	1
Simiperca scherzeri (Steindachner)	Before			Freshwater settlement	Buoyancy eggs	1	16.6	predacity	static type slow	middle and lower layers	6	Ⅰ	2	1
Simiperca scherzeri (Steindachner)	Before			Freshwater settlement	Buoyancy eggs	1	12.8	predacity	static type slow	middle and lower layers	4	Ⅰ	1	1
Abbottina rivularis (Basilewsky)	Before			Freshwater settlement	Viscous eggs	1	7.5	omnivory	static type slow	ground floor	2	Ⅱ	3	1
Abbottina rivularis (Basilewsky)	Before			Freshwater settlement	Viscous eggs	1	6.8	omnivory	static type slow	ground floor	2	Ⅰ	1	1
Abbottina rivularis (Basilewsky)	Before			Freshwater settlement	Viscous eggs	2	15.8	omnivory	static type slow	ground floor	4	Ⅰ	2	1
Abbottina rivularis (Basilewsky)	Before			Freshwater settlement	Viscous eggs	2	16.2	omnivory	static type slow	ground floor	4	Ⅰ	3	1
Abbottina rivularis (Basilewsky)	Before			Freshwater settlement	Viscous eggs	4	22.3	omnivory	static type slow	ground floor	6	Ⅱ	3	1
Abbottina rivularis (Basilewsky)	Before			Freshwater settlement	Viscous eggs	2	17.6	omnivory	static type slow	ground floor	6	Ⅰ	1	1
Abbottina rivularis (Basilewsky)	Before			Freshwater settlement	Viscous eggs	5	42.6	omnivory	static type slow	ground floor	6	Ⅰ	2	1
Trilophysa bleekeri (Sauvage et Dabry)	Before			Freshwater settlement	Viscous eggs	3	11.5	omnivory	The current type	ground floor	2	Ⅰ	1	1
Trilophysa bleekeri (Sauvage et Dabry)	Before			Freshwater settlement	Viscous eggs	2	9.9	omnivory	The current type	ground floor	2	Ⅰ	2	1
Trilophysa bleekeri (Sauvage et Dabry)	Before			Freshwater settlement	Viscous eggs	8	39.2	omnivory	The current type	ground floor	4	Ⅰ	2	1
Trilophysa bleekeri (Sauvage et Dabry)	Before			Freshwater settlement	Viscous eggs	5	24.5	omnivory	The current type	ground floor	4	Ⅰ	1	1
Trilophysa bleekeri (Sauvage et Dabry)	Before			Freshwater settlement	Viscous eggs	9	40.8	omnivory	The current type	ground floor	6	Ⅰ	3	1
Trilophysa bleekeri (Sauvage et Dabry)	Before			Freshwater settlement	Viscous eggs	15	75.6	omnivory	The current type	ground floor	6	Ⅰ	2	1
Trilophysa bleekeri (Sauvage et Dabry)	Before			Freshwater settlement	Viscous eggs	3	10.2	omnivory	The current type	ground floor	2	Ⅱ	3	1
Trilophysa bleekeri (Sauvage et Dabry)	Before			Freshwater settlement	Viscous eggs	6	19.2	omnivory	The current type	ground floor	4	Ⅱ	3	1
Trilophysa bleekeri (Sauvage et Dabry)	Before			Freshwater settlement	Viscous eggs	7	39.2	omnivory	The current type	ground floor	6	Ⅱ	1	1
Trilophysa bleekeri (Sauvage et Dabry)	Before			Freshwater settlement	Viscous eggs	9	26.2	omnivory	The current type	ground floor	6	Ⅱ	2	1
Trilophysa bleekeri (Sauvage et Dabry)	Before			Freshwater settlement	Viscous eggs	10	50.1	omnivory	The current type	ground floor	6	Ⅱ	3	1
Hemiculter leucisculus (Basilewsky)	Before			Freshwater settlement	demersal egg	3	29.4	omnivory	static type slow	upper-middle-class	2	Ⅰ	1	1
Hemiculter leucisculus (Basilewsky)	Before			Freshwater settlement	demersal egg	4	64.8	omnivory	static type slow	upper-middle-class	2	Ⅰ	3	1
Hemiculter leucisculus (Basilewsky)	Before			Freshwater settlement	demersal egg	5	75.5	omnivory	static type slow	upper-middle-class	4	Ⅰ	2	1
Hemiculter leucisculus (Basilewsky)	Before			Freshwater settlement	demersal egg	8	124.8	omnivory	static type slow	upper-middle-class	4	Ⅰ	3	1
Hemiculter leucisculus (Basilewsky)	Before			Freshwater settlement	demersal egg	5	85.5	omnivory	static type slow	upper-middle-class	6	Ⅰ	1	1
Hemiculter leucisculus (Basilewsky)	Before			Freshwater settlement	demersal egg	10	209.5	omnivory	static type slow	upper-middle-class	6	Ⅰ	2	1
Hemiculter leucisculus (Basilewsky)	Before			Freshwater settlement	demersal egg	16	335.6	omnivory	static type slow	upper-middle-class	6	Ⅰ	3	1
Hemiculter leucisculus (Basilewsky)	Before			Freshwater settlement	demersal egg	3	49.5	omnivory	static type slow	upper-middle-class	2	Ⅱ	2	1
Hemiculter leucisculus (Basilewsky)	Before			Freshwater settlement	demersal egg	3	62.7	omnivory	static type slow	upper-middle-class	2	Ⅱ	3	1
Hemiculter leucisculus (Basilewsky)	Before			Freshwater settlement	demersal egg	6	113.6	omnivory	static type slow	upper-middle-class	4	Ⅱ	3	1
Hemiculter leucisculus (Basilewsky)	Before			Freshwater settlement	demersal egg	10	186.2	omnivory	static type slow	upper-middle-class	6	Ⅱ	1	1
Hemiculter leucisculus (Basilewsky)	Before			Freshwater settlement	demersal egg	8	179.6	omnivory	static type slow	upper-middle-class	6	Ⅱ	2	1
Hemiculter leucisculus (Basilewsky)	Before			Freshwater settlement	demersal egg	12	225.6	omnivory	static type slow	upper-middle-class	6	Ⅱ	3	1
Ctenopharyngodon idellus (Cuvier et Valenciennes)	Before			River and lake migration	Drifting sex	1	883.4	phytophagous	The current type	middle and lower layers	6	Ⅰ	1	1
Ctenopharyngodon idellus (Cuvier et Valenciennes)	Before			River and lake migration	Drifting sex	1	689.9	phytophagous	The current type	middle and lower layers	6	Ⅰ	3	1
Hemibarbus labeo (Pallas)	Before			Freshwater settlement	Viscous eggs	3	269.2	omnivory	The current type	middle and lower layers	6	Ⅱ	1	1
Hemibarbus labeo (Pallas)	Before			Freshwater settlement	Viscous eggs	1	92.1	omnivory	The current type	middle and lower layers	6	Ⅱ	2	1
Hemibarbus labeo (Pallas)	Before			Freshwater settlement	Viscous eggs	1	80.7	omnivory	The current type	middle and lower layers	4	Ⅱ	1	1
Leiocassis crassilabris (Günther)	Before			Freshwater settlement	Viscous eggs	9	237.5	predacity	The current type	ground floor	4	Ⅱ	1	1
Leiocassis crassilabris (Günther)	Before			Freshwater settlement	Viscous eggs	4	100.4	predacity	The current type	ground floor	4	Ⅱ	2	1
Leiocassis crassilabris (Günther)	Before			Freshwater settlement	Viscous eggs	4	112.8	predacity	The current type	ground floor	6	Ⅱ	3	1
Leiocassis crassilabris (Günther)	Before			Freshwater settlement	Viscous eggs	2	56.2	predacity	The current type	ground floor	6	Ⅰ	3	1
Mystus macropterus (Bleeker)	Before			Freshwater settlement	Viscous eggs	2	164.4	predacity	The current type	ground floor	6	Ⅱ	1	1
Mystus macropterus (Bleeker)	Before			Freshwater settlement	Viscous eggs	1	81.5	predacity	The current type	ground floor	6	Ⅱ	2	1
Sinrperca kneri (Garman)	Before			Freshwater settlement	Buoyancy eggs	2	180.2	predacity	static type slow	middle and lower layers	6	Ⅰ	1	1
Sinrperca kneri (Garman)	Before			Freshwater settlement	Buoyancy eggs	1	82.3	predacity	static type slow	middle and lower layers	6	Ⅰ	2	1
Sinrperca kneri (Garman)	Before			Freshwater settlement	Buoyancy eggs	1	81.3	predacity	static type slow	middle and lower layers	6	Ⅰ	3	1
Sinrperca kneri (Garman)	Before			Freshwater settlement	Buoyancy eggs	1	68.8	predacity	static type slow	middle and lower layers	4	Ⅰ	1	1
Abbottina obtusirostris	Before		★	Freshwater settlement	Viscous eggs	2	24.2	omnivory	static type slow	ground floor	2	Ⅰ	1	1
Pseudolaubuca engraulis (Nichols)	Before			Freshwater settlement	Drifting sex	2	48.1	omnivory	The current type	upper-middle-class	6	Ⅰ	1	1
Pseudolaubuca engraulis (Nichols)	Before			Freshwater settlement	Drifting sex	5	120.5	omnivory	The current type	upper-middle-class	6	Ⅰ	2	1
Pseudolaubuca engraulis (Nichols)	Before			Freshwater settlement	Drifting sex	10	255.1	omnivory	The current type	upper-middle-class	6	Ⅰ	3	1
Pseudolaubuca engraulis (Nichols)	Before			Freshwater settlement	Drifting sex	3	55.8	omnivory	The current type	upper-middle-class	4	Ⅰ	2	1
Pseudolaubuca engraulis (Nichols)	Before			Freshwater settlement	Drifting sex	8	199.2	omnivory	The current type	upper-middle-class	6	Ⅱ	1	1
Pseudolaubuca engraulis (Nichols)	Before			Freshwater settlement	Drifting sex	6	145.9	omnivory	The current type	upper-middle-class	6	Ⅱ	2	1
Pelteobagrus nitidus (Sauvage et Dabry)	Before			Freshwater settlement	Viscous eggs	3	40.1	predacity	static type slow	ground floor	6	Ⅰ	2	1
Pelteobagrus nitidus (Sauvage et Dabry)	Before			Freshwater settlement	Viscous eggs	1	10.8	predacity	static type slow	ground floor	4	Ⅰ	3	1
Hemiculter tchangi(Fang)	Before		★	Freshwater settlement	Viscous eggs	4	37.9	plankton	static type slow	upper-middle-class	4	Ⅰ	2	1
Hemiculter tchangi(Fang)	Before		★	Freshwater settlement	Viscous eggs	2	15.4	plankton	static type slow	upper-middle-class	4	Ⅰ	1	1
Hemibarbus maculatus (Bleeker)	Before			Freshwater settlement	Viscous eggs	5	103.4	predacity	static type slow	middle and lower layers	4	Ⅰ	1	1
Hemibarbus maculatus (Bleeker)	Before			Freshwater settlement	Viscous eggs	3	54.2	predacity	static type slow	middle and lower layers	4	Ⅰ	2	1
Hemibarbus maculatus (Bleeker)	Before			Freshwater settlement	Viscous eggs	1	17.6	predacity	static type slow	middle and lower layers	4	Ⅰ	3	1
Hemibarbus maculatus (Bleeker)	Before			Freshwater settlement	Viscous eggs	2	42.8	predacity	static type slow	middle and lower layers	6	Ⅰ	2	1
Hemibarbus maculatus (Bleeker)	Before			Freshwater settlement	Viscous eggs	2	44.1	predacity	static type slow	middle and lower layers	6	Ⅰ	3	1
Pelteobagrus fulvidraco (Richardson)	Before			Freshwater settlement	Viscous eggs	2	62.5	predacity	static type slow	ground floor	2	Ⅰ	1	1
Pelteobagrus fulvidraco (Richardson)	Before			Freshwater settlement	Viscous eggs	2	69.1	predacity	static type slow	ground floor	2	Ⅰ	1	1
Pelteobagrus fulvidraco (Richardson)	Before			Freshwater settlement	Viscous eggs	2	71.3	predacity	static type slow	ground floor	4	Ⅰ	1	1
Pelteobagrus fulvidraco (Richardson)	Before			Freshwater settlement	Viscous eggs	1	36.9	predacity	static type slow	ground floor	4	Ⅰ	3	1
Pelteobagrus fulvidraco (Richardson)	Before			Freshwater settlement	Viscous eggs	1	30.7	predacity	static type slow	ground floor	6	Ⅰ	2	1
Pelteobagrus fulvidraco (Richardson)	Before			Freshwater settlement	Viscous eggs	2	89.6	predacity	static type slow	ground floor	6	Ⅰ	3	1
Monopterus albus (Zuiew)	Before			Freshwater settlement	Buoyancy eggs	1	30.2	predacity	static type slow	ground floor	2	Ⅰ	1	1
Carassius auratus (Linnaeus)	Before			Freshwater settlement	Viscous eggs	16	339.2	omnivory	static type slow	middle and lower layers	2	Ⅰ	1	1
Carassius auratus (Linnaeus)	Before			Freshwater settlement	Viscous eggs	6	123.6	omnivory	static type slow	middle and lower layers	2	Ⅰ	2	1
Carassius auratus (Linnaeus)	Before			Freshwater settlement	Viscous eggs	14	324.8	omnivory	static type slow	middle and lower layers	2	Ⅰ	3	1
Carassius auratus (Linnaeus)	Before			Freshwater settlement	Viscous eggs	8	193.6	omnivory	static type slow	middle and lower layers	4	Ⅰ	2	1
Carassius auratus (Linnaeus)	Before			Freshwater settlement	Viscous eggs	12	290.4	omnivory	static type slow	middle and lower layers	4	Ⅰ	3	1
Carassius auratus (Linnaeus)	Before			Freshwater settlement	Viscous eggs	24	556.8	omnivory	static type slow	middle and lower layers	6	Ⅰ	1	1
Carassius auratus (Linnaeus)	Before			Freshwater settlement	Viscous eggs	18	433.8	omnivory	static type slow	middle and lower layers	6	Ⅰ	2	1
Carassius auratus (Linnaeus)	Before			Freshwater settlement	Viscous eggs	14	315	omnivory	static type slow	middle and lower layers	6	Ⅰ	3	1
Carassius auratus (Linnaeus)	Before			Freshwater settlement	Viscous eggs	4	92.8	omnivory	static type slow	middle and lower layers	2	Ⅱ	1	1
Carassius auratus (Linnaeus)	Before			Freshwater settlement	Viscous eggs	8	193.6	omnivory	static type slow	middle and lower layers	2	Ⅱ	3	1
Carassius auratus (Linnaeus)	Before			Freshwater settlement	Viscous eggs	4	92.8	omnivory	static type slow	middle and lower layers	4	Ⅱ	3	1
Carassius auratus (Linnaeus)	Before			Freshwater settlement	Viscous eggs	7	188.4	omnivory	static type slow	middle and lower layers	6	Ⅱ	1	1
Acrossocheilus monticolus (Günther)	Before		★	Freshwater settlement	demersal egg	2	35.8	predacity	The current type	upper-middle-class	4	Ⅱ	3	1
Zacco platypus (Temminck et Schlegel)	Before			Freshwater settlement	demersal egg	1	28.8	omnivory	The current type	upper-middle-class	4	Ⅱ	1	1
Zacco platypus (Temminck et Schlegel)	Before			Freshwater settlement	demersal egg	1	33.4	omnivory	The current type	upper-middle-class	6	Ⅱ	1	1
Zacco platypus (Temminck et Schlegel)	Before			Freshwater settlement	demersal egg	1	42.8	omnivory	The current type	upper-middle-class	6	Ⅱ	2	1
Cyprinus (Cyprinus) carpio (Linnaeus)	Before			Freshwater settlement	Viscous eggs	6	560.2	omnivory	static type slow	middle and lower layers	4	Ⅰ	1	1
Cyprinus (Cyprinus) carpio (Linnaeus)	Before			Freshwater settlement	Viscous eggs	7	817.7	omnivory	static type slow	middle and lower layers	4	Ⅰ	2	1
Cyprinus (Cyprinus) carpio (Linnaeus)	Before			Freshwater settlement	Viscous eggs	3	324.2	omnivory	static type slow	middle and lower layers	4	Ⅰ	3	1
Cyprinus (Cyprinus) carpio (Linnaeus)	Before			Freshwater settlement	Viscous eggs	3	1002.2	omnivory	static type slow	middle and lower layers	6	Ⅰ	1	1
Cyprinus (Cyprinus) carpio (Linnaeus)	Before			Freshwater settlement	Viscous eggs	4	484.4	omnivory	static type slow	middle and lower layers	6	Ⅰ	2	1
Cyprinus (Cyprinus) carpio (Linnaeus)	Before			Freshwater settlement	Viscous eggs	4	504.8	omnivory	static type slow	middle and lower layers	6	Ⅰ	3	1
Cyprinus (Cyprinus) carpio (Linnaeus)	Before			Freshwater settlement	Viscous eggs	2	163.2	omnivory	static type slow	middle and lower layers	4	Ⅱ	1	1
Cyprinus (Cyprinus) carpio (Linnaeus)	Before			Freshwater settlement	Viscous eggs	2	172.2	omnivory	static type slow	middle and lower layers	4	Ⅱ	2	1
Hypophthmichthys mobitrix (Cuvier et Valenciennes)	Before			River and lake migration	Drifting sex	2	1009.3	plankton	The current type	upper-middle-class	6	Ⅰ	2	1
Opsariichthys bidens (Günther)	Before			Freshwater settlement	demersal egg	2	30.5	predacity	The current type	upper-middle-class	6	Ⅱ	3	1
Pseudorasbora parva (Temminck et Schlegel)	Before			Freshwater settlement	Viscous eggs	3	31.1	omnivory	static type slow	upper-middle-class	2	Ⅰ	1	1
Pseudorasbora parva (Temminck et Schlegel)	Before			Freshwater settlement	Viscous eggs	2	18.5	omnivory	static type slow	upper-middle-class	4	Ⅰ	2	1
Pseudorasbora parva (Temminck et Schlegel)	Before			Freshwater settlement	Viscous eggs	1	7.7	omnivory	static type slow	upper-middle-class	6	Ⅰ	2	1
Silurus meridionalis (Chen)	Before			Freshwater settlement	Viscous eggs	2	143.6	predacity	The current type	ground floor	2	Ⅱ	1	1
Silurus meridionalis (Chen)	Before			Freshwater settlement	Viscous eggs	1	48.6	predacity	The current type	ground floor	2	Ⅱ	2	1
Misgurnus anguillicaudtus (Cantor)	Before			Freshwater settlement	Viscous eggs	2	20.9	omnivory	static type slow	ground floor	4	Ⅱ	1	1
Misgurnus anguillicaudtus (Cantor)	Before			Freshwater settlement	Viscous eggs	2	18.9	omnivory	static type slow	ground floor	6	Ⅰ	3	1
Silurus asotus (Linnaeus)	Before			Freshwater settlement	Viscous eggs	2	364.2	predacity	static type slow	ground floor	4	Ⅰ	3	1
Erythroculter ilishaeformis (Bleeker)	Before			Freshwater settlement	Drifting sex	2	123.2	predacity	static type slow	upper-middle-class	6	Ⅰ	1	1
Erythroculter ilishaeformis (Bleeker)	Before			Freshwater settlement	Drifting sex	1	52.4	predacity	static type slow	upper-middle-class	6	Ⅰ	2	1
Pseudobagrus truncatus (Regan)	Before			Freshwater settlement	Viscous eggs	1	10.5	predacity	static type slow	ground floor	2	Ⅰ	1	1
Pseudobagrus truncatus (Regan)	Before			Freshwater settlement	Viscous eggs	1	16.2	predacity	static type slow	ground floor	4	Ⅰ	2	1
Pseudobagrus truncatus (Regan)	Before			Freshwater settlement	Viscous eggs	1	11.8	predacity	static type slow	ground floor	4	Ⅰ	3	1
Odontobutis obscurus (Temminck et Schlegel)	Before			Freshwater settlement	demersal egg	4	195.5	predacity	static type slow	ground floor	2	Ⅰ	1	1
Odontobutis obscurus (Temminck et Schlegel)	Before			Freshwater settlement	demersal egg	2	102.2	predacity	static type slow	ground floor	2	Ⅰ	2	1
Odontobutis obscurus (Temminck et Schlegel)	Before			Freshwater settlement	demersal egg	1	53.1	predacity	static type slow	ground floor	2	Ⅰ	3	1
Odontobutis obscurus (Temminck et Schlegel)	Before			Freshwater settlement	demersal egg	2	108.4	predacity	static type slow	ground floor	4	Ⅰ	3	1
Saurogobio dabryi (Bleeker)	Before			Freshwater settlement	demersal egg	5	60.5	omnivory	static type slow	middle and lower layers	2	Ⅰ	1	1
Saurogobio dabryi (Bleeker)	Before			Freshwater settlement	demersal egg	7	133.2	omnivory	static type slow	middle and lower layers	2	Ⅰ	2	1
Saurogobio dabryi (Bleeker)	Before			Freshwater settlement	demersal egg	2	29.1	omnivory	static type slow	middle and lower layers	2	Ⅰ	3	1
Saurogobio dabryi (Bleeker)	Before			Freshwater settlement	demersal egg	6	93.3	omnivory	static type slow	middle and lower layers	4	Ⅰ	2	1
Saurogobio dabryi (Bleeker)	Before			Freshwater settlement	demersal egg	10	217.2	omnivory	static type slow	middle and lower layers	4	Ⅰ	3	1
Saurogobio dabryi (Bleeker)	Before			Freshwater settlement	demersal egg	9	172	omnivory	static type slow	middle and lower layers	6	Ⅰ	1	1
Saurogobio dabryi (Bleeker)	Before			Freshwater settlement	demersal egg	7	142.4	omnivory	static type slow	middle and lower layers	6	Ⅰ	2	1
Saurogobio dabryi (Bleeker)	Before			Freshwater settlement	demersal egg	20	424.4	omnivory	static type slow	middle and lower layers	6	Ⅰ	3	1
Saurogobio dabryi (Bleeker)	Before			Freshwater settlement	demersal egg	3	59.5	omnivory	static type slow	middle and lower layers	2	Ⅱ	3	1
Sinibrama changi (Chang)	Before		★	Freshwater settlement	demersal egg	1	11.8	omnivory	The current type	upper-middle-class	4	Ⅱ	1	1
Sinibrama changi (Chang)	Before		★	Freshwater settlement	demersal egg	3	38.2	omnivory	The current type	upper-middle-class	4	Ⅱ	2	1
Sinibrama changi (Chang)	Before		★	Freshwater settlement	demersal egg	3	38.9	omnivory	The current type	upper-middle-class	4	Ⅱ	3	1
Sinibrama changi (Chang)	Before		★	Freshwater settlement	demersal egg	2	26.5	omnivory	The current type	upper-middle-class	6	Ⅱ	1	1
Sinibrama changi (Chang)	Before		★	Freshwater settlement	demersal egg	3	39.1	omnivory	The current type	upper-middle-class	6	Ⅱ	2	1
Sinibrama changi (Chang)	Before		★	Freshwater settlement	demersal egg	6	84.4	omnivory	The current type	upper-middle-class	6	Ⅱ	3	1
Sinibrama changi (Chang)	Before		★	Freshwater settlement	demersal egg	1	8.9	omnivory	The current type	upper-middle-class	6	Ⅱ	2	1
Pelteobagrus Vachelli (Richardson)	Before			Freshwater settlement	Viscous eggs	1	13.8	omnivory	static type slow	ground floor	4	Ⅰ	3	1
Pelteobagrus Vachelli (Richardson)	Before			Freshwater settlement	Viscous eggs	2	62.5	omnivory	static type slow	ground floor	6	Ⅰ	1	1
Pelteobagrus Vachelli (Richardson)	Before			Freshwater settlement	Viscous eggs	3	48.9	omnivory	static type slow	ground floor	6	Ⅰ	3	1
Rhinogobio typus (Bleeker)	Before			Freshwater settlement	Drifting sex	2	142.8	predacity	The current type	ground floor	4	Ⅱ	1	1
Rhinogobio typus (Bleeker)	Before			Freshwater settlement	Drifting sex	2	149.7	predacity	The current type	ground floor	4	Ⅱ	2	1
Rhinogobio typus (Bleeker)	Before			Freshwater settlement	Drifting sex	3	226.1	predacity	The current type	ground floor	6	Ⅱ	1	1
Rhinogobio typus (Bleeker)	Before			Freshwater settlement	Drifting sex	1	76.1	predacity	The current type	ground floor	6	Ⅱ	2	1
Rhinogobio typus (Bleeker)	Before			Freshwater settlement	Drifting sex	4	303.2	predacity	The current type	ground floor	6	Ⅱ	3	1
Channa argus (Cantor)	Before			Freshwater settlement	Buoyancy eggs	1	44.5	predacity	static type slow	ground floor	2	Ⅰ	3	1
Distoechodon tumirostris (Peters)	Before			Freshwater settlement	Viscous eggs	1	33.8	omnivory	static type slow	middle and lower layers	4	Ⅰ	2	1
Distoechodon tumirostris (Peters)	Before			Freshwater settlement	Viscous eggs	2	73.1	omnivory	static type slow	middle and lower layers	6	Ⅰ	2	1
Leiocassis longirostris (Günther)	Before			River and lake migration	Viscous eggs	2	61.7	predacity	static type slow	middle and lower layers	6	Ⅰ	1	1
Rhodeus ocellatus (Kaer)	Before			Freshwater settlement	Parasitic	3	18.2	omnivory	static type slow	ground floor	2	Ⅰ	1	1
Rhodeus ocellatus (Kaer)	Before			Freshwater settlement	Parasitic	3	19.1	omnivory	static type slow	ground floor	4	Ⅰ	1	1
Rhodeus ocellatus (Kaer)	Before			Freshwater settlement	Parasitic	2	16.7	omnivory	static type slow	ground floor	4	Ⅰ	3	1
Ctenogobius giurinus (Rutter)	Before			Freshwater settlement	Viscous eggs	10	49.9	predacity	static type slow	ground floor	2	Ⅰ	1	1
Ctenogobius giurinus (Rutter)	Before			Freshwater settlement	Viscous eggs	2	10.4	predacity	static type slow	ground floor	2	Ⅰ	2	1
Ctenogobius giurinus (Rutter)	Before			Freshwater settlement	Viscous eggs	4	19.8	predacity	static type slow	ground floor	2	Ⅰ	3	1
Ctenogobius giurinus (Rutter)	Before			Freshwater settlement	Viscous eggs	3	15.5	predacity	static type slow	ground floor	4	Ⅰ	1	1
Ctenogobius giurinus (Rutter)	Before			Freshwater settlement	Viscous eggs	4	20.3	predacity	static type slow	ground floor	4	Ⅰ	3	1
Ctenogobius giurinus (Rutter)	Before			Freshwater settlement	Viscous eggs	6	30.1	predacity	static type slow	ground floor	6	Ⅰ	2	1
Ctenogobius giurinus (Rutter)	Before			Freshwater settlement	Viscous eggs	6	30.3	predacity	static type slow	ground floor	6	Ⅰ	3	1
Ctenogobius giurinus (Rutter)	Before			Freshwater settlement	Viscous eggs	4	19.5	predacity	static type slow	ground floor	2	Ⅱ	3	1
Liobagrus marginatus (Günther)	After			Freshwater settlement	Viscous eggs	1	6.2	predacity	The current type	ground floor	4	Ⅱ	1	1
Liobagrus marginatus (Günther)	After			Freshwater settlement	Viscous eggs	2	12.8	predacity	The current type	ground floor	4	Ⅱ	3	1
Liobagrus marginatus (Günther)	After			Freshwater settlement	Viscous eggs	2	13.7	predacity	The current type	ground floor	6	Ⅱ	2	1
Liobagrus marginatus (Günther)	After			Freshwater settlement	Viscous eggs	3	21.1	predacity	The current type	ground floor	6	Ⅱ	3	1
Ictalurus Punctatus (Rafinesque)	After			Freshwater settlement	Viscous eggs	1	45.4	predacity	static type slow	ground floor	6	Ⅰ	2	1
Simiperca scherzeri (Steindachner)	After			Freshwater settlement	Buoyancy eggs	2	114.6	predacity	static type slow	middle and lower layers	4	Ⅰ	2	1
Simiperca scherzeri (Steindachner)	After			Freshwater settlement	Buoyancy eggs	3	177.3	predacity	static type slow	middle and lower layers	6	Ⅰ	1	1
Simiperca scherzeri (Steindachner)	After			Freshwater settlement	Buoyancy eggs	1	62.7	predacity	static type slow	middle and lower layers	6	Ⅰ	3	1
Hemiculterella sauvagei	After		★	River and lake migration	Viscous eggs	8	60.8	plankton	The current type	upper-middle-class	2	Ⅱ	2	1
Hemiculterella sauvagei	After		★	River and lake migration	Viscous eggs	6	49.2	plankton	The current type	upper-middle-class	4	Ⅱ	1	1
Hemiculterella sauvagei	After		★	River and lake migration	Viscous eggs	7	60.2	plankton	The current type	upper-middle-class	4	Ⅱ	3	1
Hemiculterella sauvagei	After		★	River and lake migration	Viscous eggs	6	52.8	plankton	The current type	upper-middle-class	6	Ⅱ	1	1
Hemiculterella sauvagei	After		★	River and lake migration	Viscous eggs	7	59.2	plankton	The current type	upper-middle-class	6	Ⅱ	2	1
Hemiculterella sauvagei	After		★	River and lake migration	Viscous eggs	14	130.6	plankton	The current type	upper-middle-class	6	Ⅱ	3	1
Abbottina rivularis (Basilewsky)	After			Freshwater settlement	Viscous eggs	2	9.8	omnivory	static type slow	ground floor	2	Ⅰ	1	1
Abbottina rivularis (Basilewsky)	After			Freshwater settlement	Viscous eggs	3	14.9	omnivory	static type slow	ground floor	2	Ⅰ	3	1
Abbottina rivularis (Basilewsky)	After			Freshwater settlement	Viscous eggs	6	30.9	omnivory	static type slow	ground floor	4	Ⅰ	2	1
Abbottina rivularis (Basilewsky)	After			Freshwater settlement	Viscous eggs	5	25.7	omnivory	static type slow	ground floor	4	Ⅰ	3	1
Abbottina rivularis (Basilewsky)	After			Freshwater settlement	Viscous eggs	6	32.1	omnivory	static type slow	ground floor	6	Ⅰ	1	1
Abbottina rivularis (Basilewsky)	After			Freshwater settlement	Viscous eggs	10	49.3	omnivory	static type slow	ground floor	6	Ⅰ	2	1
Abbottina rivularis (Basilewsky)	After			Freshwater settlement	Viscous eggs	4	19.6	omnivory	static type slow	ground floor	6	Ⅰ	3	1
Abbottina rivularis (Basilewsky)	After			Freshwater settlement	Viscous eggs	3	14.8	omnivory	static type slow	ground floor	4	Ⅱ	2	1
Abbottina rivularis (Basilewsky)	After			Freshwater settlement	Viscous eggs	2	11.3	omnivory	static type slow	ground floor	6	Ⅱ	3	1
Trilophysa bleekeri (Sauvage et Dabry)	After			Freshwater settlement	Viscous eggs	5	16.2	omnivory	The current type	ground floor	2	Ⅰ	2	1
Trilophysa bleekeri (Sauvage et Dabry)	After			Freshwater settlement	Viscous eggs	7	22.5	omnivory	The current type	ground floor	2	Ⅰ	3	1
Trilophysa bleekeri (Sauvage et Dabry)	After			Freshwater settlement	Viscous eggs	8	27.8	omnivory	The current type	ground floor	4	Ⅰ	1	1
Trilophysa bleekeri (Sauvage et Dabry)	After			Freshwater settlement	Viscous eggs	10	35.4	omnivory	The current type	ground floor	4	Ⅰ	2	1
Trilophysa bleekeri (Sauvage et Dabry)	After			Freshwater settlement	Viscous eggs	10	37.1	omnivory	The current type	ground floor	6	Ⅰ	1	1
Trilophysa bleekeri (Sauvage et Dabry)	After			Freshwater settlement	Viscous eggs	9	30.4	omnivory	The current type	ground floor	6	Ⅰ	2	1
Trilophysa bleekeri (Sauvage et Dabry)	After			Freshwater settlement	Viscous eggs	13	45.3	omnivory	The current type	ground floor	6	Ⅰ	3	1
Trilophysa bleekeri (Sauvage et Dabry)	After			Freshwater settlement	Viscous eggs	6	21.2	omnivory	The current type	ground floor	2	Ⅱ	2	1
Trilophysa bleekeri (Sauvage et Dabry)	After			Freshwater settlement	Viscous eggs	7	24.3	omnivory	The current type	ground floor	4	Ⅱ	3	1
Trilophysa bleekeri (Sauvage et Dabry)	After			Freshwater settlement	Viscous eggs	14	48.7	omnivory	The current type	ground floor	6	Ⅱ	1	1
Trilophysa bleekeri (Sauvage et Dabry)	After			Freshwater settlement	Viscous eggs	7	24.4	omnivory	The current type	ground floor	4	Ⅱ	2	1
Trilophysa bleekeri (Sauvage et Dabry)	After			Freshwater settlement	Viscous eggs	11	35.8	omnivory	The current type	ground floor	6	Ⅱ	3	1
Hemiculter leucisculus (Basilewsky)	After			Freshwater settlement	demersal egg	4	54.8	omnivory	static type slow	upper-middle-class	2	Ⅰ	1	1
Hemiculter leucisculus (Basilewsky)	After			Freshwater settlement	demersal egg	6	79.5	omnivory	static type slow	upper-middle-class	2	Ⅰ	2	1
Hemiculter leucisculus (Basilewsky)	After			Freshwater settlement	demersal egg	8	130.4	omnivory	static type slow	upper-middle-class	2	Ⅰ	3	1
Hemiculter leucisculus (Basilewsky)	After			Freshwater settlement	demersal egg	10	165.2	omnivory	static type slow	upper-middle-class	4	Ⅰ	1	1
Hemiculter leucisculus (Basilewsky)	After			Freshwater settlement	demersal egg	14	225.4	omnivory	static type slow	upper-middle-class	4	Ⅰ	2	1
Hemiculter leucisculus (Basilewsky)	After			Freshwater settlement	demersal egg	14	226.8	omnivory	static type slow	upper-middle-class	4	Ⅰ	3	1
Hemiculter leucisculus (Basilewsky)	After			Freshwater settlement	demersal egg	18	306.6	omnivory	static type slow	upper-middle-class	6	Ⅰ	1	1
Hemiculter leucisculus (Basilewsky)	After			Freshwater settlement	demersal egg	28	439.6	omnivory	static type slow	upper-middle-class	6	Ⅰ	2	1
Hemiculter leucisculus (Basilewsky)	After			Freshwater settlement	demersal egg	37	598.3	omnivory	static type slow	upper-middle-class	6	Ⅰ	3	1
Hemiculter leucisculus (Basilewsky)	After			Freshwater settlement	demersal egg	6	100.2	omnivory	static type slow	upper-middle-class	2	Ⅱ	1	1
Hemiculter leucisculus (Basilewsky)	After			Freshwater settlement	demersal egg	6	92.5	omnivory	static type slow	upper-middle-class	4	Ⅱ	1	1
Hemiculter leucisculus (Basilewsky)	After			Freshwater settlement	demersal egg	4	69.8	omnivory	static type slow	upper-middle-class	4	Ⅱ	2	1
Hemiculter leucisculus (Basilewsky)	After			Freshwater settlement	demersal egg	4	63.7	omnivory	static type slow	upper-middle-class	4	Ⅱ	3	1
Hemiculter leucisculus (Basilewsky)	After			Freshwater settlement	demersal egg	7	120.6	omnivory	static type slow	upper-middle-class	6	Ⅱ	3	1
idellus (Cuvier et Valenciennes)	After			River and lake migration	Drifting sex	4	1869.3	phytophagous	The current type	middle and lower layers	6	Ⅰ	1	1
idellus (Cuvier et Valenciennes)	After			River and lake migration	Drifting sex	3	827.8	phytophagous	The current type	middle and lower layers	6	Ⅰ	2	1
idellus (Cuvier et Valenciennes)	After			River and lake migration	Drifting sex	2	384.8	phytophagous	The current type	middle and lower layers	6	Ⅱ	3	1
Hemibarbus labeo (Pallas)	After			Freshwater settlement	Viscous eggs	4	85.6	omnivory	The current type	middle and lower layers	6	Ⅱ	1	1
Hemibarbus labeo (Pallas)	After			Freshwater settlement	Viscous eggs	2	41.6	omnivory	The current type	middle and lower layers	6	Ⅱ	2	1
Hemibarbus labeo (Pallas)	After			Freshwater settlement	Viscous eggs	3	63.2	omnivory	The current type	middle and lower layers	4	Ⅱ	2	1
Hemibarbus labeo (Pallas)	After			Freshwater settlement	Viscous eggs	1	23.8	omnivory	The current type	middle and lower layers	4	Ⅱ	3	1
Leiocassis crassilabris (Günther)	After			Freshwater settlement	Viscous eggs	2	61.1	predacity	The current type	ground floor	4	Ⅱ	2	1
Leiocassis crassilabris (Günther)	After			Freshwater settlement	Viscous eggs	4	120.8	predacity	The current type	ground floor	6	Ⅱ	2	1
Leiocassis crassilabris (Günther)	After			Freshwater settlement	Viscous eggs	2	58.8	predacity	The current type	ground floor	6	Ⅱ	3	1
Mystus macropterus (Bleeker)	After			Freshwater settlement	Viscous eggs	2	61.3	predacity	The current type	ground floor	6	Ⅱ	1	1
Sinrperca kneri (Garman)	After			Freshwater settlement	Buoyancy eggs	2	86.2	predacity	static type slow	middle and lower layers	6	Ⅰ	3	1
Sinrperca kneri (Garman)	After			Freshwater settlement	Buoyancy eggs	1	41.5	predacity	static type slow	middle and lower layers	6	Ⅰ	2	1
Sinrperca kneri (Garman)	After			Freshwater settlement	Buoyancy eggs	1	35.6	predacity	static type slow	middle and lower layers	4	Ⅰ	3	1
Abbottina obtusirostris	After		★	Freshwater settlement	Viscous eggs	1	5.7	omnivory	static type slow	ground floor	2	Ⅰ	3	1
Ancherythroculter kurematsui (Sh. Kimura)	After		★	Freshwater settlement	demersal egg	1	33	predacity	The current type	upper-middle-class	6	Ⅱ	2	1
Pseudolaubuca engraulis (Nichols)	After			Freshwater settlement	Drifting sex	3	66.7	omnivory	The current type	upper-middle-class	4	Ⅰ	1	1
Pseudolaubuca engraulis (Nichols)	After			Freshwater settlement	Drifting sex	5	116.1	omnivory	The current type	upper-middle-class	4	Ⅰ	2	1
Pseudolaubuca engraulis (Nichols)	After			Freshwater settlement	Drifting sex	7	156.1	omnivory	The current type	upper-middle-class	4	Ⅰ	3	1
Pseudolaubuca engraulis (Nichols)	After			Freshwater settlement	Drifting sex	9	209.7	omnivory	The current type	upper-middle-class	6	Ⅰ	2	1
Pseudolaubuca engraulis (Nichols)	After			Freshwater settlement	Drifting sex	13	293.8	omnivory	The current type	upper-middle-class	6	Ⅰ	3	1
Pseudolaubuca engraulis (Nichols)	After			Freshwater settlement	Drifting sex	6	197.1	omnivory	The current type	upper-middle-class	4	Ⅱ	1	1
Pseudolaubuca engraulis (Nichols)	After			Freshwater settlement	Drifting sex	7	158.2	omnivory	The current type	upper-middle-class	6	Ⅱ	2	1
Pseudolaubuca engraulis (Nichols)	After			Freshwater settlement	Drifting sex	9	135.8	omnivory	The current type	upper-middle-class	6	Ⅱ	3	1
Pelteobagrus nitidus (Sauvage et Dabry)	After			Freshwater settlement	Viscous eggs	1	10.9	predacity	static type slow	ground floor	2	Ⅰ	2	1
Pelteobagrus nitidus (Sauvage et Dabry)	After			Freshwater settlement	Viscous eggs	1	11.8	predacity	static type slow	ground floor	4	Ⅰ	2	1
Pelteobagrus nitidus (Sauvage et Dabry)	After			Freshwater settlement	Viscous eggs	2	25.1	predacity	static type slow	ground floor	6	Ⅰ	2	1
Pelteobagrus nitidus (Sauvage et Dabry)	After			Freshwater settlement	Viscous eggs	2	25.3	predacity	static type slow	ground floor	6	Ⅰ	3	1
Hemiculter tchangi(Fang)	After		★	Freshwater settlement	Viscous eggs	2	21.6	plankton	static type slow	upper-middle-class	4	Ⅰ	1	1
Hemiculter tchangi(Fang)	After		★	Freshwater settlement	Viscous eggs	3	35.7	plankton	static type slow	upper-middle-class	4	Ⅰ	3	1
Hemiculter tchangi(Fang)	After		★	Freshwater settlement	Viscous eggs	3	36.1	plankton	static type slow	upper-middle-class	6	Ⅰ	1	1
Hemiculter tchangi(Fang)	After		★	Freshwater settlement	Viscous eggs	4	47.6	plankton	static type slow	upper-middle-class	6	Ⅰ	2	1
Hemiculter tchangi(Fang)	After		★	Freshwater settlement	Viscous eggs	7	85.7	plankton	static type slow	upper-middle-class	6	Ⅰ	3	1
Hemibarbus maculatus (Bleeker)	After			Freshwater settlement	Viscous eggs	5	31.2	predacity	static type slow	middle and lower layers	4	Ⅰ	1	1
Hemibarbus maculatus (Bleeker)	After			Freshwater settlement	Viscous eggs	5	33.4	predacity	static type slow	middle and lower layers	4	Ⅰ	2	1
Hemibarbus maculatus (Bleeker)	After			Freshwater settlement	Viscous eggs	3	21.7	predacity	static type slow	middle and lower layers	4	Ⅰ	3	1
Hemibarbus maculatus (Bleeker)	After			Freshwater settlement	Viscous eggs	7	48.3	predacity	static type slow	middle and lower layers	6	Ⅰ	1	1
Hemibarbus maculatus (Bleeker)	After			Freshwater settlement	Viscous eggs	10	70.1	predacity	static type slow	middle and lower layers	6	Ⅰ	2	1
Hemibarbus maculatus (Bleeker)	After			Freshwater settlement	Viscous eggs	13	92.7	predacity	static type slow	middle and lower layers	6	Ⅰ	3	1
Pelteobagrus fulvidraco (Richardson)	After			Freshwater settlement	Viscous eggs	2	31.5	predacity	static type slow	ground floor	4	Ⅰ	1	1
Pelteobagrus fulvidraco (Richardson)	After			Freshwater settlement	Viscous eggs	3	56.2	predacity	static type slow	ground floor	6	Ⅰ	2	1
Pelteobagrus fulvidraco (Richardson)	After			Freshwater settlement	Viscous eggs	2	40	predacity	static type slow	ground floor	6	Ⅱ	1	1
Xenocypris davidi （Bleeker）	After			River and lake migration	Viscous eggs	1	76.6	phytophagous	static type slow	ground floor	6	Ⅰ	3	1
Carassius auratus (Linnaeus)	After			Freshwater settlement	Viscous eggs	8	161.8	omnivory	static type slow	middle and lower layers	2	Ⅰ	2	1
Carassius auratus (Linnaeus)	After			Freshwater settlement	Viscous eggs	10	217.7	omnivory	static type slow	middle and lower layers	2	Ⅰ	3	1
Carassius auratus (Linnaeus)	After			Freshwater settlement	Viscous eggs	14	317.8	omnivory	static type slow	middle and lower layers	4	Ⅰ	1	1
Carassius auratus (Linnaeus)	After			Freshwater settlement	Viscous eggs	12	262.8	omnivory	static type slow	middle and lower layers	4	Ⅰ	2	1
Carassius auratus (Linnaeus)	After			Freshwater settlement	Viscous eggs	12	267	omnivory	static type slow	middle and lower layers	4	Ⅰ	3	1
Carassius auratus (Linnaeus)	After			Freshwater settlement	Viscous eggs	20	482.2	omnivory	static type slow	middle and lower layers	6	Ⅰ	1	1
Carassius auratus (Linnaeus)	After			Freshwater settlement	Viscous eggs	34	811.8	omnivory	static type slow	middle and lower layers	6	Ⅰ	2	1
Carassius auratus (Linnaeus)	After			Freshwater settlement	Viscous eggs	54	1258.2	omnivory	static type slow	middle and lower layers	6	Ⅰ	3	1
Carassius auratus (Linnaeus)	After			Freshwater settlement	Viscous eggs	8	161.6	omnivory	static type slow	middle and lower layers	2	Ⅱ	1	1
Carassius auratus (Linnaeus)	After			Freshwater settlement	Viscous eggs	8	158.4	omnivory	static type slow	middle and lower layers	4	Ⅱ	1	1
Carassius auratus (Linnaeus)	After			Freshwater settlement	Viscous eggs	10	230.5	omnivory	static type slow	middle and lower layers	4	Ⅱ	2	1
Carassius auratus (Linnaeus)	After			Freshwater settlement	Viscous eggs	16	366.4	omnivory	static type slow	middle and lower layers	6	Ⅱ	2	1
Carassius auratus (Linnaeus)	After			Freshwater settlement	Viscous eggs	18	408.6	omnivory	static type slow	middle and lower layers	6	Ⅱ	3	1
Zacco platypus (Temminck et Schlegel)	After			Freshwater settlement	demersal egg	2	39.6	omnivory	The current type	upper-middle-class	4	Ⅱ	1	1
Zacco platypus (Temminck et Schlegel)	After			Freshwater settlement	demersal egg	3	60.8	omnivory	The current type	upper-middle-class	4	Ⅱ	3	1
Zacco platypus (Temminck et Schlegel)	After			Freshwater settlement	demersal egg	5	103	omnivory	The current type	upper-middle-class	6	Ⅱ	2	1
Zacco platypus (Temminck et Schlegel)	After			Freshwater settlement	demersal egg	1	23	omnivory	The current type	upper-middle-class	6	Ⅱ	3	1
Cyprinus (Cyprinus) carpio (Linnaeus)	After			Freshwater settlement	Viscous eggs	2	198.1	omnivory	static type slow	middle and lower layers	2	Ⅱ	2	1
Cyprinus (Cyprinus) carpio (Linnaeus)	After			Freshwater settlement	Viscous eggs	2	201.5	omnivory	static type slow	middle and lower layers	4	Ⅰ	2	1
Cyprinus (Cyprinus) carpio (Linnaeus)	After			Freshwater settlement	Viscous eggs	4	468.4	omnivory	static type slow	middle and lower layers	4	Ⅰ	1	1
Cyprinus (Cyprinus) carpio (Linnaeus)	After			Freshwater settlement	Viscous eggs	5	682	omnivory	static type slow	middle and lower layers	6	Ⅰ	1	1
Cyprinus (Cyprinus) carpio (Linnaeus)	After			Freshwater settlement	Viscous eggs	7	889.4	omnivory	static type slow	middle and lower layers	6	Ⅰ	2	1
Cyprinus (Cyprinus) carpio (Linnaeus)	After			Freshwater settlement	Viscous eggs	10	1300.1	omnivory	static type slow	middle and lower layers	6	Ⅰ	3	1
Cyprinus (Cyprinus) carpio (Linnaeus)	After			Freshwater settlement	Viscous eggs	2	258.2	omnivory	static type slow	middle and lower layers	6	Ⅱ	1	1
Cyprinus (Cyprinus) carpio (Linnaeus)	After			Freshwater settlement	Viscous eggs	2	219.4	omnivory	static type slow	middle and lower layers	4	Ⅱ	3	1
Hypophthmichthys mobitrix (Cuvier et Valenciennes)	After			River and lake migration	Drifting sex	1	434.3	plankton	The current type	upper-middle-class	6	Ⅰ	1	1
Hypophthmichthys mobitrix (Cuvier et Valenciennes)	After			River and lake migration	Drifting sex	1	346.5	plankton	The current type	upper-middle-class	6	Ⅰ	2	1
Hypophthmichthys mobitrix (Cuvier et Valenciennes)	After			River and lake migration	Drifting sex	1	221.2	plankton	The current type	upper-middle-class	6	Ⅱ	3	1
Opsariichthys bidens (Günther)	After			Freshwater settlement	demersal egg	2	35.8	predacity	The current type	upper-middle-class	6	Ⅱ	1	1
Opsariichthys bidens (Günther)	After			Freshwater settlement	demersal egg	2	27.2	predacity	The current type	upper-middle-class	6	Ⅱ	2	1
Pseudorasbora parva (Temminck et Schlegel)	After			Freshwater settlement	Viscous eggs	2	13.6	omnivory	static type slow	upper-middle-class	2	Ⅰ	1	1
Pseudorasbora parva (Temminck et Schlegel)	After			Freshwater settlement	Viscous eggs	2	13.8	omnivory	static type slow	upper-middle-class	2	Ⅰ	3	1
Pseudorasbora parva (Temminck et Schlegel)	After			Freshwater settlement	Viscous eggs	2	14.7	omnivory	static type slow	upper-middle-class	4	Ⅰ	2	1
Pseudorasbora parva (Temminck et Schlegel)	After			Freshwater settlement	Viscous eggs	3	20.7	omnivory	static type slow	upper-middle-class	4	Ⅰ	1	1
Pseudorasbora parva (Temminck et Schlegel)	After			Freshwater settlement	Viscous eggs	5	35.1	omnivory	static type slow	upper-middle-class	6	Ⅰ	3	1
Pseudorasbora parva (Temminck et Schlegel)	After			Freshwater settlement	Viscous eggs	1	7	omnivory	static type slow	upper-middle-class	2	Ⅱ	3	1
Erythroculter mongolicus mongolicus	After			Freshwater settlement	demersal egg	1	147.8	predacity	static type slow	upper-middle-class	4	Ⅰ	1	1
Erythroculter mongolicus mongolicus	After			Freshwater settlement	demersal egg	1	195.8	predacity	static type slow	upper-middle-class	4	Ⅰ	2	1
Erythroculter mongolicus mongolicus	After			Freshwater settlement	demersal egg	2	444.1	predacity	static type slow	upper-middle-class	4	Ⅰ	3	1
Erythroculter mongolicus mongolicus	After			Freshwater settlement	demersal egg	2	455.7	predacity	static type slow	upper-middle-class	6	Ⅰ	1	1
Erythroculter mongolicus mongolicus	After			Freshwater settlement	demersal egg	1	259.6	predacity	static type slow	upper-middle-class	6	Ⅰ	2	1
Erythroculter mongolicus mongolicus	After			Freshwater settlement	demersal egg	2	592.2	predacity	static type slow	upper-middle-class	6	Ⅰ	3	1
Silurus meridionalis (Chen)	After			Freshwater settlement	Viscous eggs	1	66.9	predacity	The current type	ground floor	2	Ⅱ	1	1
Silurus meridionalis (Chen)	After			Freshwater settlement	Viscous eggs	2	155.1	predacity	The current type	ground floor	2	Ⅱ	3	1
Silurus meridionalis (Chen)	After			Freshwater settlement	Viscous eggs	1	85.2	predacity	The current type	ground floor	4	Ⅱ	3	1
Misgurnus anguillicaudtus (Cantor)	After			Freshwater settlement	Viscous eggs	1	15.6	omnivory	static type slow	ground floor	4	Ⅰ	1	1
Misgurnus anguillicaudtus (Cantor)	After			Freshwater settlement	Viscous eggs	1	16.8	omnivory	static type slow	ground floor	4	Ⅰ	2	1
Misgurnus anguillicaudtus (Cantor)	After			Freshwater settlement	Viscous eggs	1	22.1	omnivory	static type slow	ground floor	6	Ⅱ	3	1
Misgurnus anguillicaudtus (Cantor)	After			Freshwater settlement	Viscous eggs	2	41.9	omnivory	static type slow	ground floor	6	Ⅰ	1	1
Silurus asotus (Linnaeus)	After			Freshwater settlement	Viscous eggs	1	54.5	predacity	static type slow	ground floor	4	Ⅰ	1	1
Silurus asotus (Linnaeus)	After			Freshwater settlement	Viscous eggs	2	111.1	predacity	static type slow	ground floor	4	Ⅰ	3	1
Silurus asotus (Linnaeus)	After			Freshwater settlement	Viscous eggs	1	56.4	predacity	static type slow	ground floor	6	Ⅰ	2	1
Silurus asotus (Linnaeus)	After			Freshwater settlement	Viscous eggs	3	173.4	predacity	static type slow	ground floor	6	Ⅰ	3	1
Pseudolaubuca sinensis (Bleeker)	After			Freshwater settlement	demersal egg	3	59.1	omnivory	static type slow	upper-middle-class	6	Ⅰ	1	1
Pseudolaubuca sinensis (Bleeker)	After			Freshwater settlement	demersal egg	2	34.2	omnivory	static type slow	upper-middle-class	6	Ⅱ	2	1
Pseudolaubuca sinensis (Bleeker)	After			Freshwater settlement	demersal egg	2	36.8	omnivory	static type slow	upper-middle-class	6	Ⅱ	1	1
Erythroculter ilishaeformis (Bleeker)	After			Freshwater settlement	Drifting sex	4	79.6	predacity	static type slow	upper-middle-class	4	Ⅰ	1	1
Erythroculter ilishaeformis (Bleeker)	After			Freshwater settlement	Drifting sex	6	117	predacity	static type slow	upper-middle-class	4	Ⅰ	2	1
Erythroculter ilishaeformis (Bleeker)	After			Freshwater settlement	Drifting sex	15	358.5	predacity	static type slow	upper-middle-class	6	Ⅰ	1	1
Erythroculter ilishaeformis (Bleeker)	After			Freshwater settlement	Drifting sex	16	382.4	predacity	static type slow	upper-middle-class	6	Ⅰ	2	1
Erythroculter ilishaeformis (Bleeker)	After			Freshwater settlement	Drifting sex	25	629.6	predacity	static type slow	upper-middle-class	6	Ⅰ	3	1
Erythroculter ilishaeformis (Bleeker)	After			Freshwater settlement	Drifting sex	8	203.2	predacity	static type slow	upper-middle-class	6	Ⅱ	2	1
Pseudobagrus truncatus (Regan)	After			Freshwater settlement	Viscous eggs	1	11.5	predacity	static type slow	ground floor	2	Ⅰ	1	1
Pseudobagrus truncatus (Regan)	After			Freshwater settlement	Viscous eggs	2	28.6	predacity	static type slow	ground floor	2	Ⅰ	3	1
Pseudobagrus truncatus (Regan)	After			Freshwater settlement	Viscous eggs	4	57.9	predacity	static type slow	ground floor	4	Ⅰ	1	1
Pseudobagrus truncatus (Regan)	After			Freshwater settlement	Viscous eggs	3	45.9	predacity	static type slow	ground floor	4	Ⅰ	2	1
Pseudobagrus truncatus (Regan)	After			Freshwater settlement	Viscous eggs	2	29.3	predacity	static type slow	ground floor	4	Ⅰ	3	1
Odontobutis obscurus (Temminck et Schlegel)	After			Freshwater settlement	demersal egg	3	50.7	predacity	static type slow	ground floor	2	Ⅰ	1	1
Odontobutis obscurus (Temminck et Schlegel)	After			Freshwater settlement	demersal egg	1	17.1	predacity	static type slow	ground floor	2	Ⅰ	3	1
Odontobutis obscurus (Temminck et Schlegel)	After			Freshwater settlement	demersal egg	2	34	predacity	static type slow	ground floor	4	Ⅰ	3	1
Saurogobio dabryi (Bleeker)	After			Freshwater settlement	demersal egg	8	76.2	omnivory	static type slow	middle and lower layers	2	Ⅰ	1	1
Saurogobio dabryi (Bleeker)	After			Freshwater settlement	demersal egg	5	69.5	omnivory	static type slow	middle and lower layers	2	Ⅰ	2	1
Saurogobio dabryi (Bleeker)	After			Freshwater settlement	demersal egg	10	146.2	omnivory	static type slow	middle and lower layers	2	Ⅰ	3	1
Saurogobio dabryi (Bleeker)	After			Freshwater settlement	demersal egg	12	172.8	omnivory	static type slow	middle and lower layers	4	Ⅰ	1	1
Saurogobio dabryi (Bleeker)	After			Freshwater settlement	demersal egg	14	204.4	omnivory	static type slow	middle and lower layers	4	Ⅰ	2	1
Saurogobio dabryi (Bleeker)	After			Freshwater settlement	demersal egg	17	246.5	omnivory	static type slow	middle and lower layers	4	Ⅰ	3	1
Saurogobio dabryi (Bleeker)	After			Freshwater settlement	demersal egg	33	465.3	omnivory	static type slow	middle and lower layers	6	Ⅰ	1	1
Saurogobio dabryi (Bleeker)	After			Freshwater settlement	demersal egg	21	311.3	omnivory	static type slow	middle and lower layers	6	Ⅰ	2	1
Saurogobio dabryi (Bleeker)	After			Freshwater settlement	demersal egg	51	801.2	omnivory	static type slow	middle and lower layers	6	Ⅰ	3	1
Saurogobio dabryi (Bleeker)	After			Freshwater settlement	demersal egg	10	145.6	omnivory	static type slow	middle and lower layers	2	Ⅱ	1	1
Saurogobio dabryi (Bleeker)	After			Freshwater settlement	demersal egg	15	208.5	omnivory	static type slow	middle and lower layers	2	Ⅱ	2	1
Saurogobio dabryi (Bleeker)	After			Freshwater settlement	demersal egg	13	180.6	omnivory	static type slow	middle and lower layers	4	Ⅱ	3	1
Saurogobio dabryi (Bleeker)	After			Freshwater settlement	demersal egg	21	300.8	omnivory	static type slow	middle and lower layers	6	Ⅱ	3	1
Pseudobrama simoni (Bleeker)	After			River and lake migration	Drifting sex	2	67.9	predacity	static type slow	upper-middle-class	6	Ⅰ	1	1
Pseudobrama simoni (Bleeker)	After			River and lake migration	Drifting sex	1	38.9	predacity	static type slow	upper-middle-class	6	Ⅰ	2	1
Sinibrama changi (Chang)	After		★	Freshwater settlement	demersal egg	2	38.8	omnivory	The current type	upper-middle-class	4	Ⅰ	1	1
Sinibrama changi (Chang)	After		★	Freshwater settlement	demersal egg	1	18.9	omnivory	The current type	upper-middle-class	4	Ⅰ	2	1
Sinibrama changi (Chang)	After		★	Freshwater settlement	demersal egg	1	19.5	omnivory	The current type	upper-middle-class	4	Ⅰ	3	1
Sinibrama changi (Chang)	After		★	Freshwater settlement	demersal egg	2	40.8	omnivory	The current type	upper-middle-class	6	Ⅰ	1	1
Sinibrama changi (Chang)	After		★	Freshwater settlement	demersal egg	2	42.2	omnivory	The current type	upper-middle-class	6	Ⅰ	2	1
Sinibrama changi (Chang)	After		★	Freshwater settlement	demersal egg	3	62.1	omnivory	The current type	upper-middle-class	6	Ⅰ	3	1
Sinibrama changi (Chang)	After		★	Freshwater settlement	demersal egg	2	40.4	omnivory	The current type	upper-middle-class	6	Ⅱ	3	1
Pelteobagrus Vachelli (Richardson)	After			Freshwater settlement	Viscous eggs	3	40.8	omnivory	static type slow	ground floor	2	Ⅱ	3	1
Pelteobagrus Vachelli (Richardson)	After			Freshwater settlement	Viscous eggs	4	55.9	omnivory	static type slow	ground floor	2	Ⅰ	1	1
Pelteobagrus Vachelli (Richardson)	After			Freshwater settlement	Viscous eggs	3	43.2	omnivory	static type slow	ground floor	4	Ⅰ	2	1
Pelteobagrus Vachelli (Richardson)	After			Freshwater settlement	Viscous eggs	2	29	omnivory	static type slow	ground floor	4	Ⅰ	3	1
Pelteobagrus Vachelli (Richardson)	After			Freshwater settlement	Viscous eggs	4	57.6	omnivory	static type slow	ground floor	6	Ⅰ	1	1
Pelteobagrus Vachelli (Richardson)	After			Freshwater settlement	Viscous eggs	7	103.6	omnivory	static type slow	ground floor	6	Ⅰ	2	1
Pelteobagrus Vachelli (Richardson)	After			Freshwater settlement	Viscous eggs	3	49	omnivory	static type slow	ground floor	6	Ⅰ	3	1
Rhinogobio typus (Bleeker)	After			Freshwater settlement	Drifting sex	2	145.2	predacity	The current type	ground floor	4	Ⅱ	2	1
Rhinogobio typus (Bleeker)	After			Freshwater settlement	Drifting sex	3	230.5	predacity	The current type	ground floor	4	Ⅱ	3	1
Rhinogobio typus (Bleeker)	After			Freshwater settlement	Drifting sex	4	305.2	predacity	The current type	ground floor	6	Ⅱ	1	1
Rhinogobio typus (Bleeker)	After			Freshwater settlement	Drifting sex	4	312.8	predacity	The current type	ground floor	6	Ⅱ	2	1
Rhinogobio typus (Bleeker)	After			Freshwater settlement	Drifting sex	2	150.6	predacity	The current type	ground floor	6	Ⅱ	3	1
Channa argus (Cantor)	After			Freshwater settlement	Buoyancy eggs	1	109.6	predacity	static type slow	ground floor	2	Ⅰ	1	1
Procypris rabaudi (Tchang)	After	●	★	Freshwater settlement	Viscous eggs	1	82.7	predacity	The current type	middle and lower layers	2	Ⅱ	2	1
Squalidus argentatus	After			Freshwater settlement	demersal egg	9	113.4	omnivory	static type slow	middle and lower layers	6	Ⅰ	1	1
Squalidus argentatus	After			Freshwater settlement	demersal egg	3	36.6	omnivory	static type slow	middle and lower layers	6	Ⅰ	2	1
Squalidus argentatus	After			Freshwater settlement	demersal egg	5	57.7	omnivory	static type slow	middle and lower layers	6	Ⅰ	3	1
Distoechodon tumirostris (Peters)	After			Freshwater settlement	Viscous eggs	1	69.8	omnivory	static type slow	middle and lower layers	4	Ⅰ	2	1
Distoechodon tumirostris (Peters)	After			Freshwater settlement	Viscous eggs	2	165.2	omnivory	static type slow	middle and lower layers	6	Ⅰ	2	1
Distoechodon tumirostris (Peters)	After			Freshwater settlement	Viscous eggs	1	81.9	omnivory	static type slow	middle and lower layers	6	Ⅰ	3	1
Xenocypris yunnanensis (Nichols)	After	●	★	Freshwater settlement	Viscous eggs	1	243.9	omnivory	static type slow	middle and lower layers	6	Ⅰ	2	1
Acipenser dabryarus Dumeril	After	●	★	Freshwater settlement	Viscous eggs	1	54.8	predacity	The current type	middle and lower layers	4	Ⅱ	2	1
Rhinogobio ventralis （Savage et Dabry）	After		★	Freshwater settlement	Drifting sex	1	112.2	predacity	The current type	middle and lower layers	2	Ⅱ	3	1
Leiocassis longirostris (Günther)	After			River and lake migration	Viscous eggs	2	72.8	predacity	static type slow	middle and lower layers	4	Ⅰ	2	1
Rhodeus ocellatus (Kaer)	After			Freshwater settlement	Parasitic	2	12.6	omnivory	static type slow	ground floor	2	Ⅰ	1	1
Rhodeus ocellatus (Kaer)	After			Freshwater settlement	Parasitic	2	9.8	omnivory	static type slow	ground floor	2	Ⅰ	2	1
Rhodeus ocellatus (Kaer)	After			Freshwater settlement	Parasitic	1	4.9	omnivory	static type slow	ground floor	2	Ⅰ	3	1
Rhodeus ocellatus (Kaer)	After			Freshwater settlement	Parasitic	3	16.8	omnivory	static type slow	ground floor	4	Ⅰ	1	1
Rhodeus ocellatus (Kaer)	After			Freshwater settlement	Parasitic	2	10.2	omnivory	static type slow	ground floor	4	Ⅰ	2	1
Rhodeus ocellatus (Kaer)	After			Freshwater settlement	Parasitic	3	16.2	omnivory	static type slow	ground floor	6	Ⅰ	1	1
Rhodeus ocellatus (Kaer)	After			Freshwater settlement	Parasitic	5	28.6	omnivory	static type slow	ground floor	6	Ⅰ	2	1
Rhodeus ocellatus (Kaer)	After			Freshwater settlement	Parasitic	3	16.5	omnivory	static type slow	ground floor	6	Ⅰ	3	1
Rhodeus ocellatus (Kaer)	After			Freshwater settlement	Parasitic	1	5.7	omnivory	static type slow	ground floor	2	Ⅱ	3	1
Rhodeus ocellatus (Kaer)	After			Freshwater settlement	Parasitic	3	15.6	omnivory	static type slow	ground floor	4	Ⅱ	1	1
Rhodeus ocellatus (Kaer)	After			Freshwater settlement	Parasitic	2	11.3	omnivory	static type slow	ground floor	4	Ⅱ	2	1
Rhodeus ocellatus (Kaer)	After			Freshwater settlement	Parasitic	2	12.7	omnivory	static type slow	ground floor	6	Ⅱ	3	1
Ctenogobius giurinus (Rutter)	After			Freshwater settlement	Viscous eggs	2	7.5	predacity	static type slow	ground floor	2	Ⅰ	1	1
Ctenogobius giurinus (Rutter)	After			Freshwater settlement	Viscous eggs	1	3.4	predacity	static type slow	ground floor	2	Ⅰ	3	1
Ctenogobius giurinus (Rutter)	After			Freshwater settlement	Viscous eggs	2	7.1	predacity	static type slow	ground floor	4	Ⅰ	2	1
Ctenogobius giurinus (Rutter)	After			Freshwater settlement	Viscous eggs	2	6.8	predacity	static type slow	ground floor	4	Ⅰ	1	1
Ctenogobius giurinus (Rutter)	After			Freshwater settlement	Viscous eggs	1	3.9	predacity	static type slow	ground floor	6	Ⅰ	1	1
Ctenogobius giurinus (Rutter)	After			Freshwater settlement	Viscous eggs	3	11.4	predacity	static type slow	ground floor	6	Ⅰ	2	1
Ctenogobius giurinus (Rutter)	After			Freshwater settlement	Viscous eggs	3	12.7	predacity	static type slow	ground floor	6	Ⅰ	3	1
Ctenogobius giurinus (Rutter)	After			Freshwater settlement	Viscous eggs	2	6.8	predacity	static type slow	ground floor	2	Ⅱ	3	1
Ctenogobius giurinus (Rutter)	After			Freshwater settlement	Viscous eggs	2	6.9	predacity	static type slow	ground floor	4	Ⅱ	1	1
Ctenogobius giurinus (Rutter)	After			Freshwater settlement	Viscous eggs	1	3.5	predacity	static type slow	ground floor	6	Ⅱ	1	1
Ctenogobius giurinus (Rutter)	After			Freshwater settlement	Viscous eggs	2	8.1	predacity	static type slow	ground floor	6	Ⅱ	2	1
